# Supplementary material for: Multifunctional biodegradable terbium-doped calcium phosphate nanoparticles: facile preparation, pH-sensitive drug release and in vitro bioimaging
Source: Royal Society of Chemistry journal article supplement (doi:10.1039/c4ra09902h), 2014-10-22
Supplement: c4ra09902h1.pdf [file c4ra09902h1.pdf]

**Multifunctional Biodegradable Terbium-Doped Calcium Phosphate  
Nanoparticles: Facile Preparation, pH-Sensitive Drug Release and *in Vitro*  
Bioimaging**

Han-Bing Shang,<sup>a,†</sup> Feng Chen<sup>b,†</sup>, Jin Wu,<sup>b</sup> Chao Qi,<sup>b</sup> Bing-Qiang Lu,<sup>b</sup> Xi Chen,<sup>c,\*</sup>  
Ying-Jie Zhu<sup>b,\*</sup>

<sup>a</sup> Department of Neurosurgery, Rui Jin Hospital, Shanghai Jiao Tong University  
School of Medicine, Shanghai 200025, P. R. China.

<sup>b</sup> State Key Laboratory of High Performance Ceramics and Superfine  
Microstructure, Shanghai Institute of Ceramics, Chinese Academy of Sciences,  
Shanghai 200050, P. R. China.

<sup>c</sup> Department of Preventive and Pediatric Dentistry, Ninth People's Hospital,  
Shanghai Jiao Tong University School of Medicine, Shanghai 200011, P. R.  
China

† These authors contributed equally to this work and should be considered as co-  
first authors.

\*Corresponding author:

Phone: 0086-21-52412616. Fax: 0086-21-52413122.

E-mail: y.j.zhu@mail.sic.ac.cn (Y. J. Zhu); cherry\_cxnet@hotmail.com (X. Chen)

**Determination of drug loading capacity:**

The drug loading capacity was estimated by TG analysis of the as-prepared Tb–CaP nanoparticles without and with docetaxel loading (Figure 5a). The drug loading capacity ( $y$ ) was calculated according to the following formula:

$$y = \frac{\Delta W2 - \Delta W1}{1 - \Delta W2} \times 100 \%$$

The  $\Delta W1$  (14.6 %) and  $\Delta W2$  (22 %) are the weight loss of Tb–CaP nanoparticles without and with docetaxel loading, respectively. Therefore, the docetaxel loaded in the Tb–CaP nanoparticles is calculated to be about 95 mg g<sup>-1</sup> (mg drug per gram of the carrier).

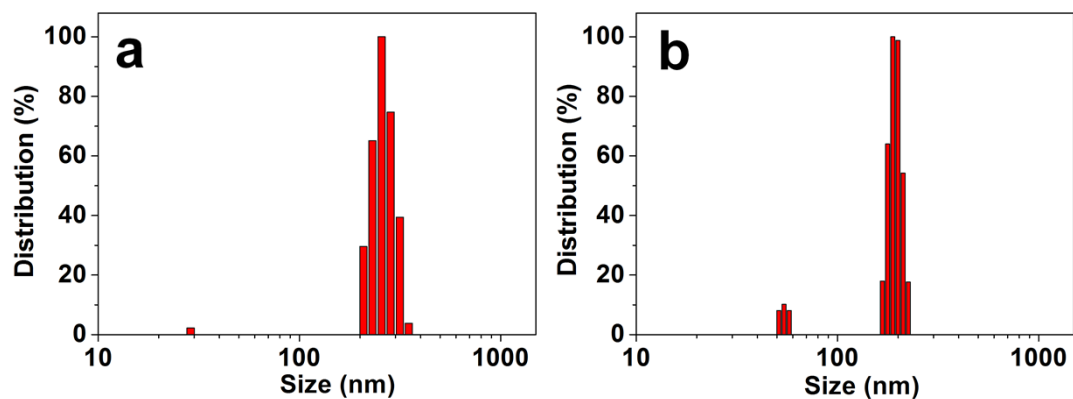

Figure S1. Size distributions of the as-prepared undoped CaP nanoparticles (a) and Tb-CaP nanoparticles (b) dispersed in ethanol measured by dynamic light scattering (DLS).

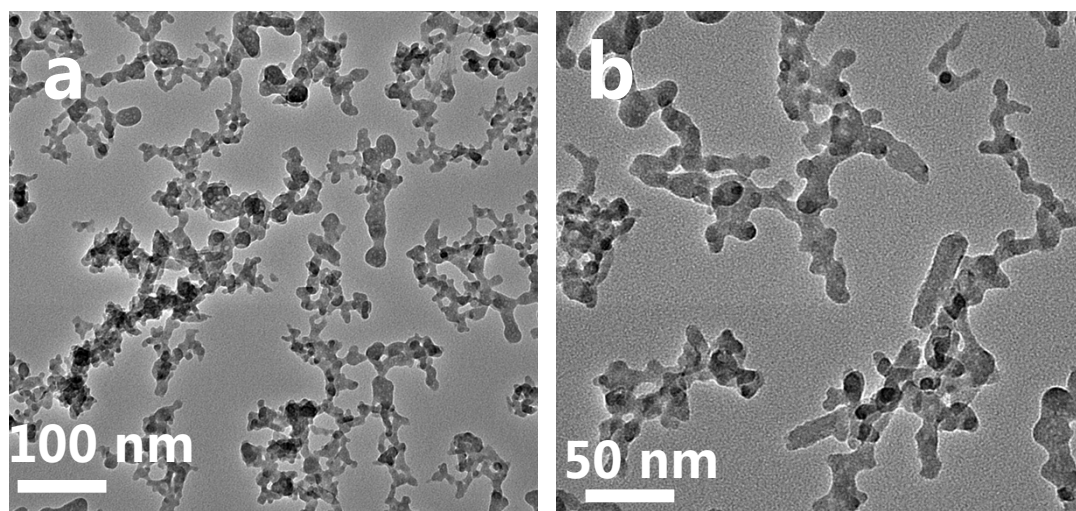

Figure S2. TEM micrographs of undoped CaP nanoparticles prepared in the absence of mPEG-PLA.

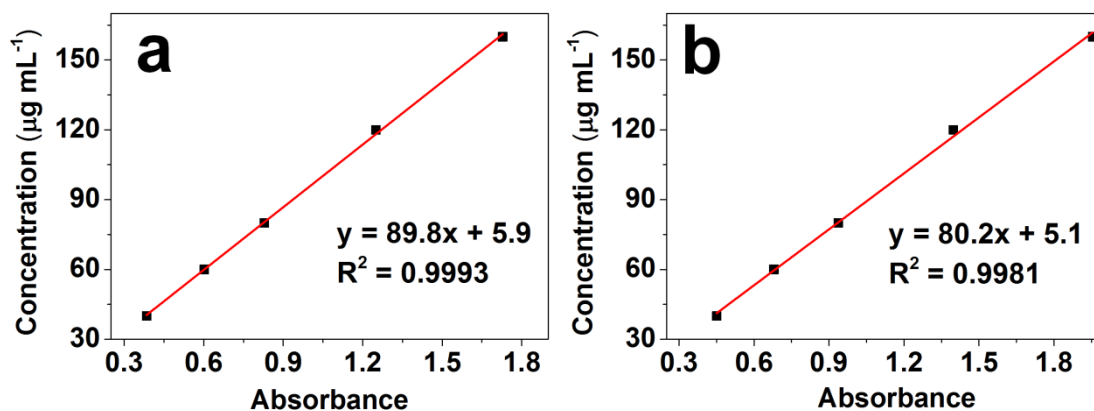

Figure S3. The calibration curves measured in PBS solutions with different pH values of 4.5 (a) and 7.4 (b) used for the quantification of docetaxel release by the UV-vis absorption analysis.

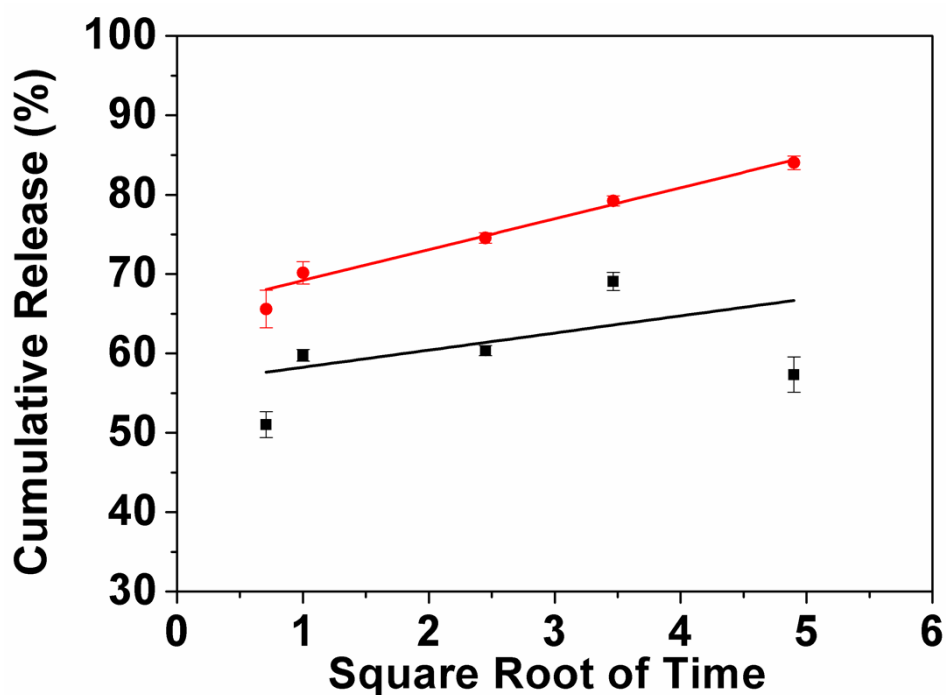

Figure S4. The cumulative docetaxel drug release percentage versus square root of release time for docetaxel-loaded Tb-CaP nanoparticles in PBS with different pH values of 4.5 and 7.4.
